# Supplementary material for: Porous organic polymers for selective enrichment of trace Cu(ii) in food and water samples
Source: Royal Society of Chemistry journal article supplement (doi:10.1039/d4ra08024f), 2025-01-01
Supplement: d4ra08024f1.pdf [file d4ra08024f1.pdf]

**Supplementary Information**

**Porous Organic Polymer Nanosheets for Selective Enrichment of Trace Cu(II) in Food and Water Samples**

**Uzma Haseen<sup>a\*</sup>, Sakshi Kapoor<sup>b</sup>, Rais Ahmad Khan<sup>c</sup>, Bon Heun Koo<sup>d</sup>**

<sup>a</sup> Department of Chemistry, Aligarh Muslim University, Aligarh 202001, India.

<sup>b</sup> Nanoscale Research Facility, Indian Institute of Technology Delhi, Haus Khas, New Delhi, 110016, India.

<sup>c</sup> Department of Chemistry, College of Science, King Saud University, Riyadh 11451, Saudi Arabia.

<sup>d</sup> School of Materials Science and Engineering, Changwon National University, Changwon 51140, Gyeongnam, South Korea.

*\*Corresponding author*

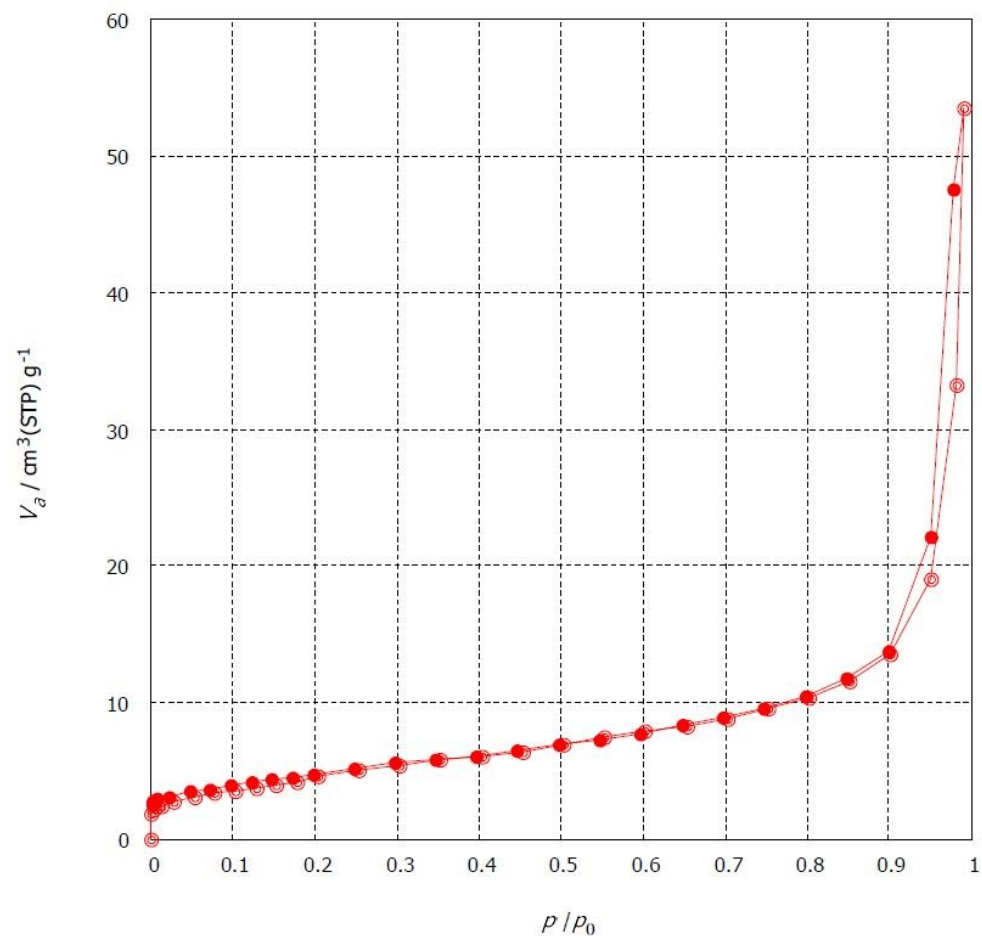

**Figure S1.**  $N_2$  adsorption-desorption isotherm of prepared POPs.

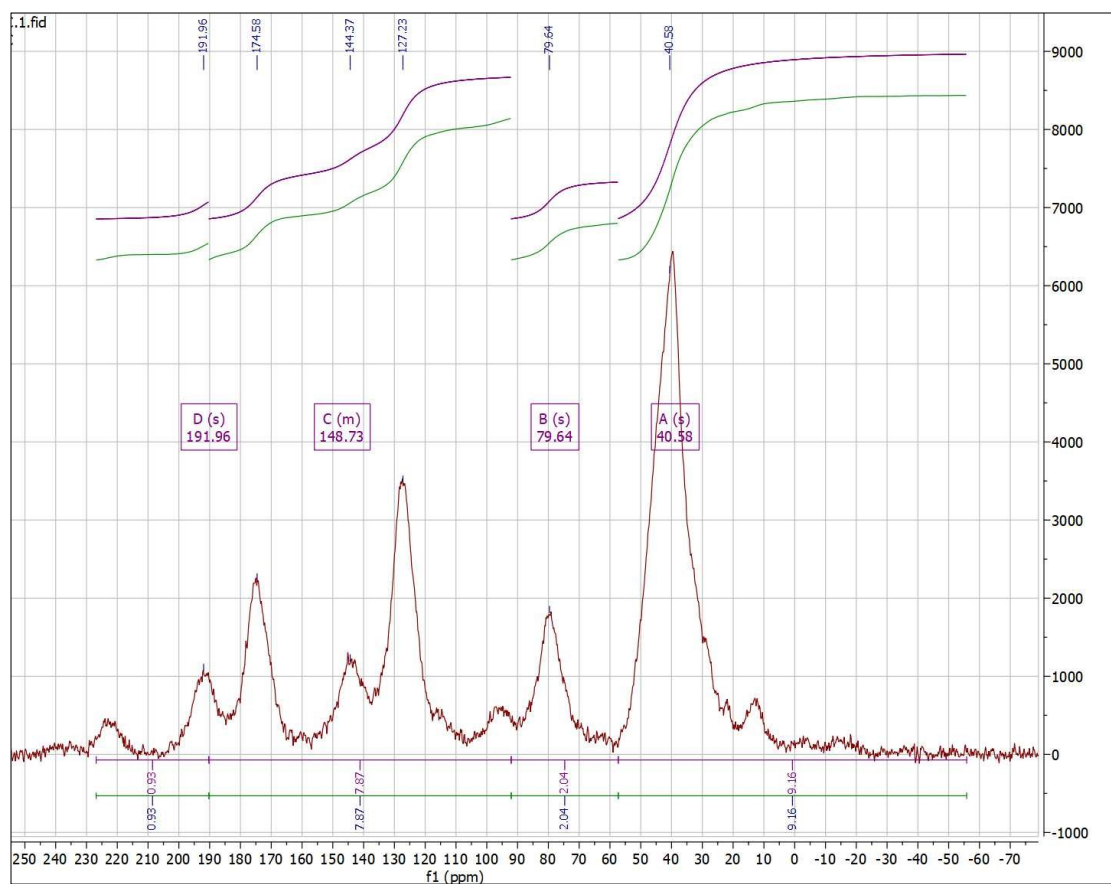

**Figure S2:**  $^{13}\text{C}$  NMR spectra of prepared material.

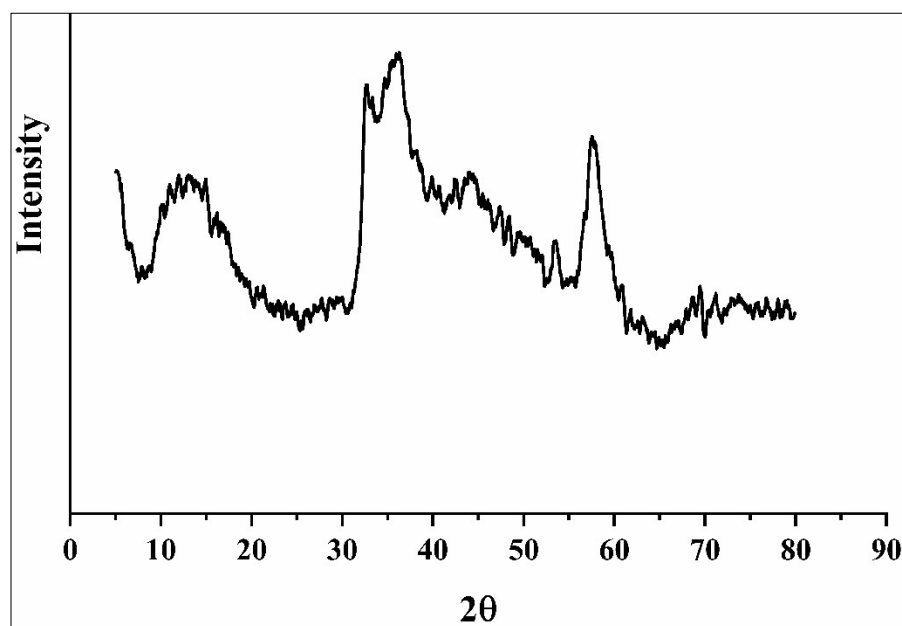

**Figure S3:** XRD spectra of prepared material.
